# Supplementary material for: First-principles study of vanadium carbides as electrocatalysts for hydrogen and oxygen evolution reactions
Source: Royal Society of Chemistry journal article supplement (doi:10.1039/c9ra06539c), 2019-01-01
Supplement: c9ra06539c1.pdf [file c9ra06539c1.pdf]

## SUPPORT INFORMATION

### Theoretical investigation of Vanadium Carbides as electrocatalysts for HER and OER

Jing Wan<sup>ab</sup>, Congcong Wang<sup>a</sup>, Qian Tang<sup>a</sup>, Xiao Gu<sup>b\*</sup>, Mingquan He<sup>a\*</sup>

<sup>a</sup> Chongqing Key Laboratory of Soft Condensed Matter Physics and Smart Materials, College of Physics, Chongqing University, Chongqing 401331, China

<sup>b</sup> School of Physical Science and Technology, Ningbo University, Ningbo 315000, China

E-mail: [guxiao@nbu.edu.cn](mailto:guxiao@nbu.edu.cn); [mingquan.he@cqu.edu.cn](mailto:mingquan.he@cqu.edu.cn)

**KEYWORDS:** *Vanadium Carbides, Electrocatalysts,  $\Delta G(H^*)$ , Pt-like catalysts*

#### Theoretical calculations

##### 1. The hydrogen evolution reaction (HER) in the acidic condition

The HER reaction in the acid media could be expressed by:

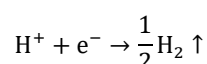

There are three possible reaction steps for the HER process in the acid media, the first step is called as Volmer:

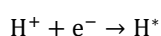

Where \* and  $H^*$  were the surface of catalysts and the hydrogen atom adsorbed on the surface of electrodes, respectively. The second reaction step was the generation of hydrogen, it was called Tafel step or Heyrovsky step:

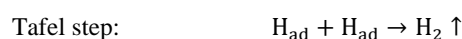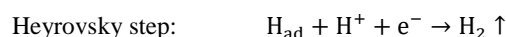

For the HER, the Gibbs free energy  $\Delta G(H^*)$  was generally considered as an descriptor, and the  $\Delta G(H^*)$  was calculated by the following steps:

(1)  $\Delta G(H^*) = \Delta E(H^*) + \Delta ZPE(H^*) - T\Delta S(H^*)$

(2)  $\Delta E(H^*) = E(H^*) - E(\text{slab}) - 1/2 E(H_2)$

(3)  $\Delta ZPE(H^*) = ZPE(H^*) - 1/2 ZPE(H)$

(4)  $\Delta S(H^*) = S(H^*) - 1/2 S(H_2) - S(\text{slab})$

##### 2. The hydrogen evolution reaction (HER) in the alkaline condition

The HER reaction in the alkaline media was conducted by:

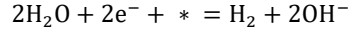

Like HER in the acid media, and the total reaction can be divided into three possible reactions, called Volmer, Tafel and Heyrovsky steps.

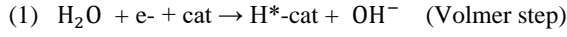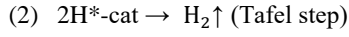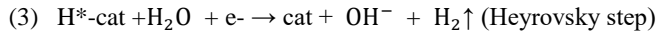

The Volmer step is a key step in splitting water, thus the energy barrier of splitting water is an important descriptor for HER in the alkaline solutions. In this work, in order to calculate the energy barrier of splitting water, the nudged elastic band method (NEB) was carried.

### 3. The oxygen evolution reaction (OER) in acidic condition

the total reaction for oxidation of water to produce oxygen is

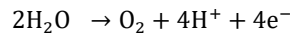

Four steps were built to describe OER:

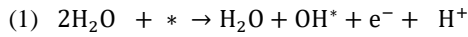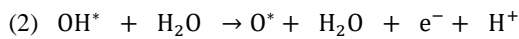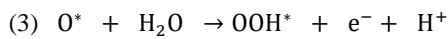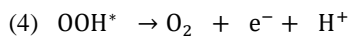

Gibbs free energy of these reaction can follow Nørskov et al  $\Delta G(i^*) = \Delta E(i^*) + \Delta \text{ZPE}(i^*) - T\Delta S(i^*)$ , and total energy of O, OH and OOH can be calculated relative to  $\text{H}_2\text{O}$  and  $\text{H}_2$ .

$$(5) E(\text{OH}^*) = E(\text{H}_2\text{O}) - 1/2 E(\text{H}_2)$$

$$(6) E(\text{O}^*) = E(\text{H}_2\text{O}) - E(\text{H}_2)$$

$$(7) E(\text{OOH}^*) = 2E(\text{H}_2\text{O}) - 3/2 E(\text{H}_2)$$

The Gibbs free energy change for steps (1-4) can be calculated by:

$$(8) \Delta G1 = \Delta G(\text{OH}^*) - eU$$

$$(9) \Delta G2 = \Delta G(\text{O}^*) - \Delta G(\text{OH}^*) - eU$$

$$(10) \Delta G3 = \Delta G(\text{OOH}^*) - \Delta G(\text{O}^*) - eU$$

$$(11) \Delta G4 = 4.92 - \Delta G(\text{OOH}^*) - eU$$

Where U is the potential measured against normal hydrogen electrode (NHE) at standard conditions (T = 298.15 K, P = 1 bar, pH = 0). Then reaction overpotential is defined as  $\eta = \max(\Delta G1, \Delta G2, \Delta G3, \Delta G4)/e - 1.23$ . For the calculation of  $\Delta G(i^*)$ ,  $\Delta E(i^*)$  is the binding energy;  $\Delta \text{ZPE}(i^*)$  is the changes in zero point energy, calculated through frozen phonon approach, which can be approximated by the formula:  $\text{ZPE} = 1/2 [\sum h\nu_i]$ , where h and  $\nu_i$  are Planck constant and zone center vibrational frequencies of system;  $T\Delta S(i^*)$  is entropic contribution at standard condition (T=298 K and P=1 bar), as listed in CRC Handbook.

Table S1 lattice and sites information of Vanadium Carbides

| Lattice information |                       |             |                                                                                  |
|---------------------|-----------------------|-------------|----------------------------------------------------------------------------------|
|                     | Lattice constants (Å) | Space group | Sites information                                                                |
| $V_4C_3$            | 8.219                 | Fm-3m       | V1 (0.125, 0.375, 0.125)<br>V2 (0.375, 0.375, 0.375)                             |
| $V_8C_7$            | 8.315                 | $P4_332$    | C1 (0.125, 0.125, 0.125)<br>C2 (0.125, 0.625, 0.625)<br>C3 (0.125, 0.375, 0.875) |
| VC                  | 8.305                 | Fm-3m       | V (0, 0, 0)<br>C (0.5, 0.5, 0.5)                                                 |

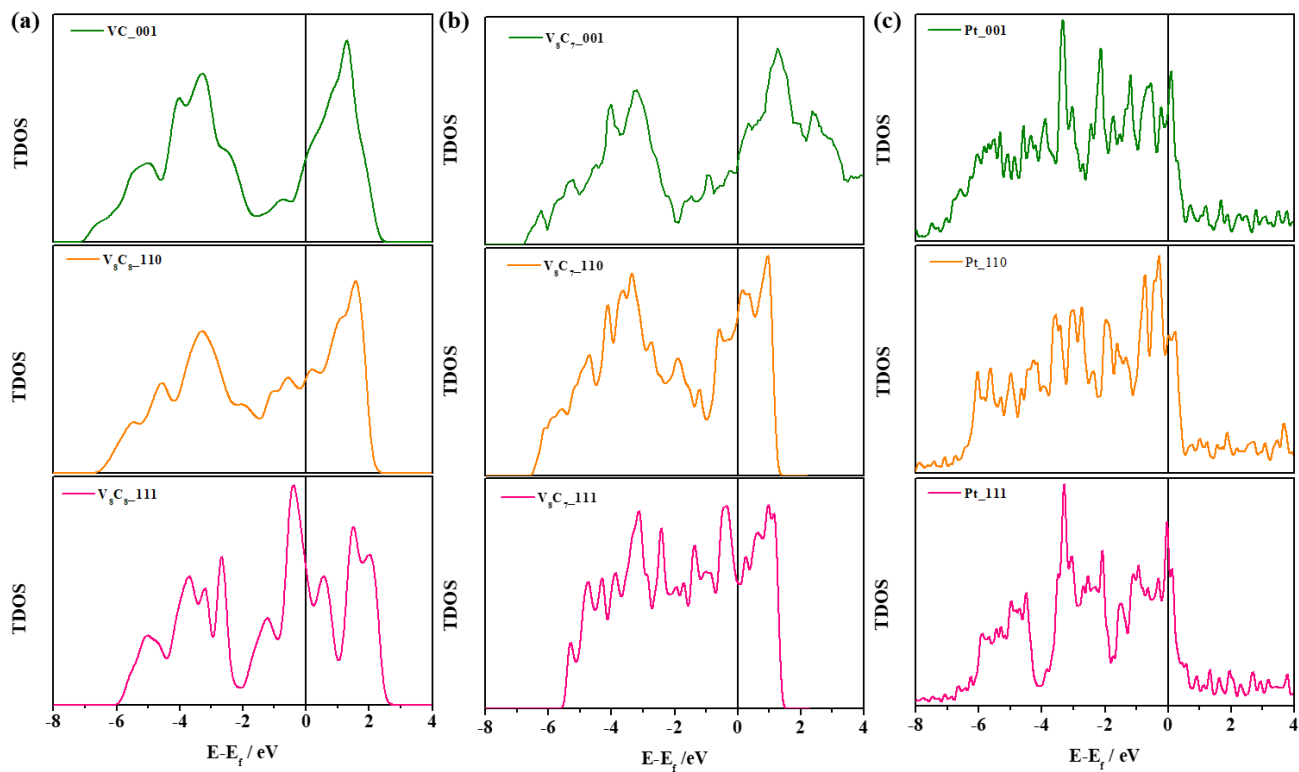

Figure S1 density of state (DOS) of Vanadium Carbides and Pt, (a), (b) and (c) are VC,  $V_8C_7$  and Pt.

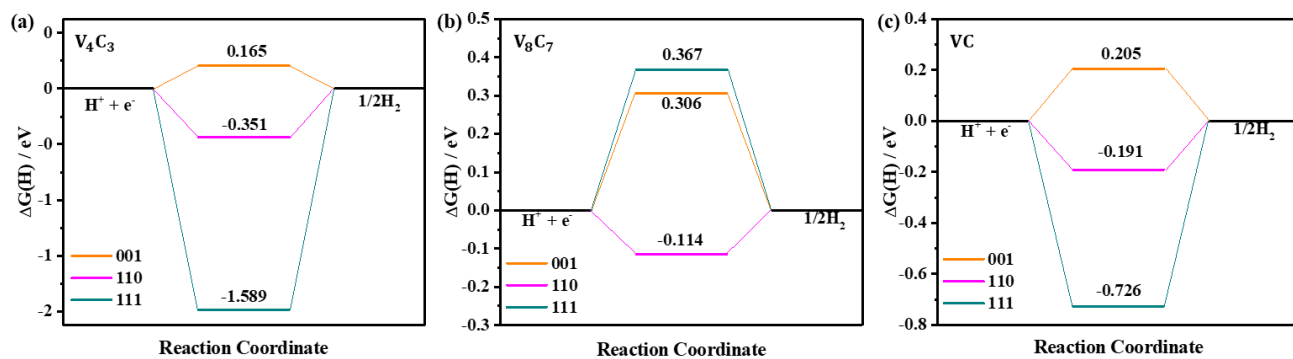

Figure S2 (a), (b) and (c) are the free energy curve of  $V_4C_3$ ,  $V_8C_7$  and VC, respectively.

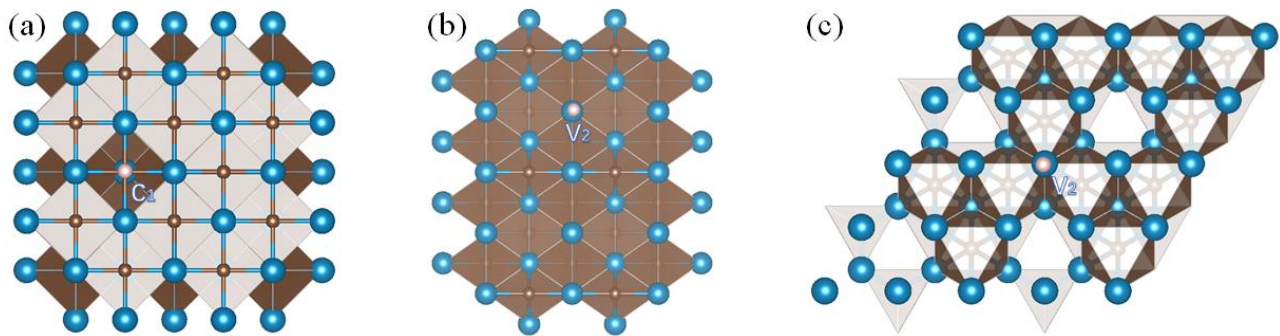

Figure S3. The H\* sites with the lowest adsorption energy in  $V_4C_3$ . (a) Adsorption site  $C_1$  for (100) surface, (b) adsorption site  $V_2$  for (110), (c) adsorption site  $V_2$  for (111).

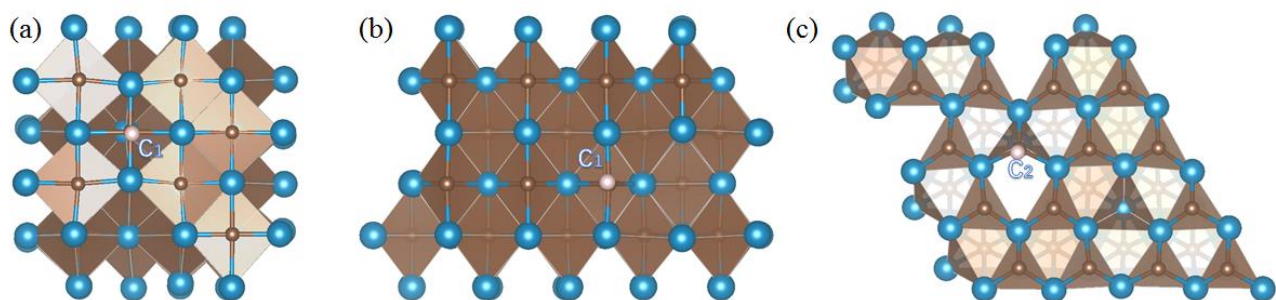

Figure S4. The H\* sites with the lowest adsorption energy in  $V_8C_7$ . (a) Adsorption site  $C_1$  for (100) surface, (b) adsorption site  $C_1$  for (110), (c) adsorption site  $C_2$  for (111).

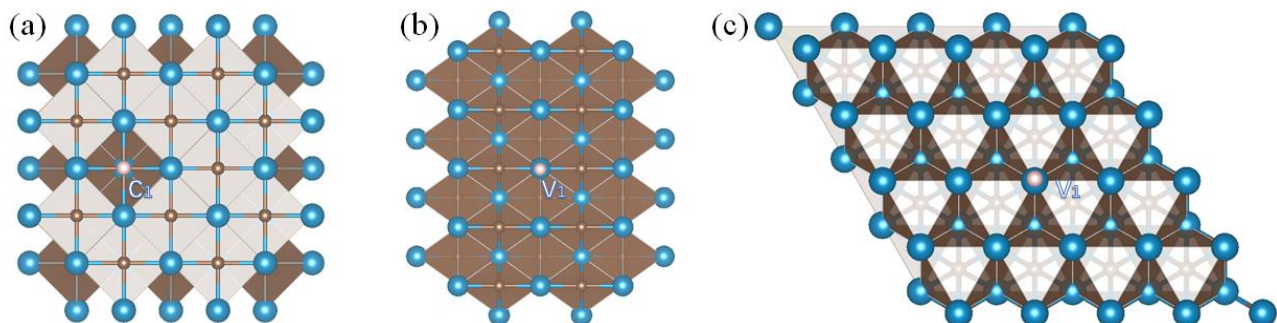

Figure S5. The H\* sites with the lowest adsorption energy  $VC$ . (a) Adsorption site  $C_1$  for (100) surface, (b) adsorption site  $V_1$  for (110), (c) adsorption site  $V_1$  for (111).

Table S2 The values of  $\Delta E(H^*)$ ,  $ZPE(H^*)$ ,  $\Delta ZPE(H^*)$  and  $\Delta G(H^*)$  of hydrogen atoms at the different adsorption sites on the surface of  $V_4C_3$  (100), (110), and (111).

| Surface    | Absorption site | $\Delta E(H^*)$<br>eV | $ZPE(H^*)$<br>eV | $\Delta ZPE(H^*)$<br>eV | $\Delta G(H^*)$<br>eV |
|------------|-----------------|-----------------------|------------------|-------------------------|-----------------------|
| <b>001</b> | C1              | -0.06                 | 0.154            | 0.015                   | 0.165                 |
|            | C2              | -1.445                | 0.159            | 0.02                    | -1.215                |
|            | V1              | 0.663                 | 0.124            | -0.014                  | 0.859                 |
|            | V2              | -2.1638               | 0.124            | -0.014                  | -1.967                |
| <b>110</b> | C1              | -0.621                | 0.194            | 0.055                   | -0.356                |
|            | V1              | -2.003                | 0.126            | -0.012                  | -1.805                |
|            | V2              | -0.555                | 0.126            | -0.012                  | -0.351                |
| <b>111</b> | V1              | -2.049                | 0.122            | 0.012                   | -1.827                |
|            | V2              | -1.785                | 0.124            | -0.014                  | -1.589                |
|            | V3              | -2.05                 | 0.123            | -0.016                  | -1.856                |

Table S3 The values of  $\Delta E(H^*)$ ,  $ZPE(H^*)$ ,  $\Delta ZPE(H^*)$  and  $\Delta G(H^*)$  of hydrogen atoms at the different adsorption sites on the surface of  $V_8C_7$  (100), (110), and (111)

| Surface    | Absorption site | $\Delta E(H^*)$<br>eV | $ZPE(H^*)$<br>eV | $\Delta ZPE(H^*)$<br>eV | $\Delta G(H^*)$<br>eV |
|------------|-----------------|-----------------------|------------------|-------------------------|-----------------------|
| <b>001</b> | C1              | 0.089                 | 0.155            | 0.016                   | 0.306                 |
|            | V1              | -0.635                | 0.149            | 0.009                   | -0.425                |
| <b>110</b> | C1              | -0.374                | 0.200            | 0.060                   | -0.114                |
|            | C2              | -0.575                | 0.226            | 0.086                   | -0.289                |
|            | V1              | -0.363                | 0.123            | 0.015                   | -0.178                |
|            | V2              | -0.374                | 0.122            | -0.016                  | -0.191                |
| <b>111</b> | C1              | -0.707                | 0.245            | 0.106                   | 0.401                 |
|            | C2              | -0.575                | 0.237            | 0.098                   | 0.367                 |
|            | V1              | -0.753                | 0.123            | -0.015                  | -0.569                |
|            | V2              | -0.780                | 0.123            | -0.015                  | -0.595                |

Table S4 The values of  $\Delta E(H^*)$ ,  $ZPE(H^*)$ ,  $\Delta ZPE(H^*)$  and  $\Delta G(H^*)$  of hydrogen atoms at the different adsorption sites on the surface of VC (100), (110), and (111).

| Surface    | Absorption site | $\Delta E(H^*)$<br>eV | $ZPE(H^*)$<br>eV | $\Delta ZPE(H^*)$<br>eV | $\Delta G(H^*)$<br>eV |
|------------|-----------------|-----------------------|------------------|-------------------------|-----------------------|
| <b>100</b> | C1              | -0.009                | 0.154            | 0.015                   | 0.205                 |
|            | V1              | -0.01                 | 0.154            | 0.015                   | 0.205                 |
| <b>110</b> | C1              | -0.989                | 0.211            | 0.073                   | -0.715                |
|            | V1              | -0.375                | 0.123            | -0.015                  | -0.191                |
| <b>111</b> | C1              | -1.464                | 0.225            | 0.085                   | -1.178                |
|            | V1              | -0.912                | 0.124            | -0.014                  | -0.726                |

Table S5 free energies of OH\*, O\*, OOH\*

| Samples                            | Adsorption | $\Delta G$ (eV) | Overpotential (V) |
|------------------------------------|------------|-----------------|-------------------|
| V <sub>4</sub> C <sub>3</sub> _001 | OH*        | 0.768           | 1.55              |
|                                    | O*         | 1.109           |                   |
|                                    | OOH*       | 3.89            |                   |
| V <sub>4</sub> C <sub>3</sub> _110 | OH*        | -1.498          | 6.505             |
|                                    | O*         | -0.068          |                   |
|                                    | OOH*       | -2.815          |                   |
| V <sub>4</sub> C <sub>3</sub> _111 | OH*        | -0.424          | 6.677             |
|                                    | O*         | -1.376          |                   |
|                                    | OOH*       | -2.987          |                   |
| VC_001                             | OH*        | 0.644           | 1.7               |
|                                    | O*         | 0.759           |                   |
|                                    | OOH*       | 3.898           |                   |
| VC_110                             | OH*        | -0.969          | 5.155             |
|                                    | O*         | 0.020           |                   |
|                                    | OOH*       | -1.465          |                   |
| VC_111                             | OH*        | -1.752          | 7.657             |
|                                    | O*         | -1.087          |                   |
|                                    | OOH*       | -3.967          |                   |
| V <sub>8</sub> C <sub>7</sub> _001 | OH*        | 0.317           | 1.803             |
|                                    | O*         | 0.657           |                   |
|                                    | OOH*       | 3.443           |                   |
| V <sub>8</sub> C <sub>7</sub> _110 | OH*        | -0.217          | 5.68              |
|                                    | O*         | -1.383          |                   |
|                                    | OOH*       | -1.99           |                   |
| V <sub>8</sub> C <sub>7</sub> _111 | OH*        | -0.703          | 4.101             |
|                                    | O*         | -1.641          |                   |
|                                    | OOH*       | 2.143           |                   |

Table S6. The surface energies of  $V_8C_6$ ,  $V_8C_7$ ,  $V_8C_8$ , with the lowest adsorption energy in  $V_8C_6$ . (a) Adsorption site  $C_1$  for (100) surface, (b) adsorption site  $V_2$  for (110), (c) adsorption site  $V_2$  for (111).

| Sample   | Planes | Surface energy ( $J.m^{-2}$ ) |
|----------|--------|-------------------------------|
| $V_4C_3$ | 001    | 1.845                         |
|          | 110    | 3.249                         |
|          | 111    | 4.261                         |
| $V_8C_7$ | 001    | 1.737                         |
|          | 110    | 4.405                         |
|          | 111    | 5.056                         |
| VC       | 001    | 1.408                         |
|          | 110    | 3.261                         |
|          | 111    | 4.776                         |

Table S7 calculated formation of  $V_4C_3$ ,  $V_8C_7$ , VC

| Sample   | $\Delta E_f/eV$ |
|----------|-----------------|
| $V_4C_3$ | -0.429          |
| $V_8C_7$ | -0.617          |
| VC       | -0.502          |

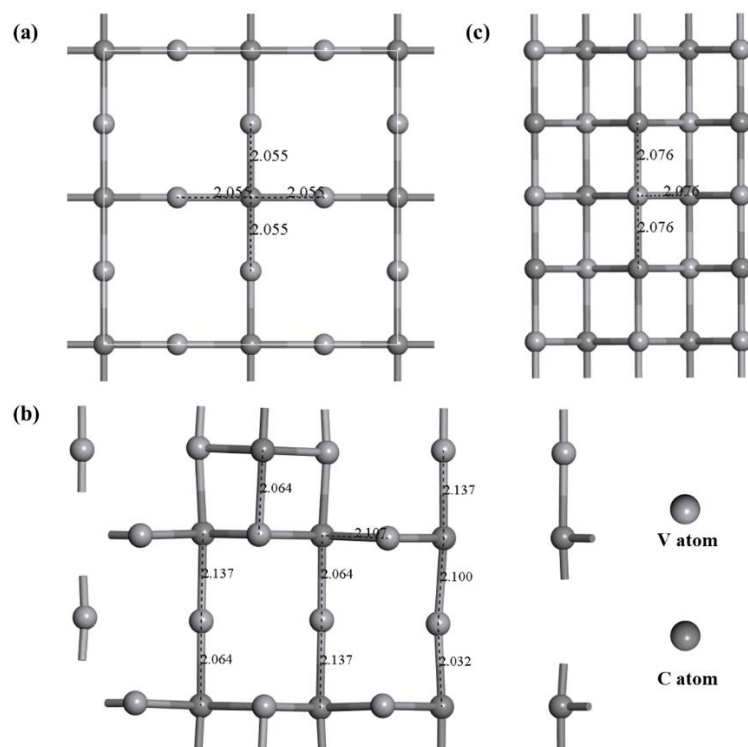

Figure S6. (a) V-C bonds length of  $V_4C_3_{001}$ , (b) V-C bonds length of  $V_8C_7_{110}$ , (c) V-C bonds length of  $VC_{110}$ .
